# Supplementary material
Source: MDPI journal article supplement (https://www.mdpi.com/2227-9717/12/1/35)
Supplement: s1 [file s1]

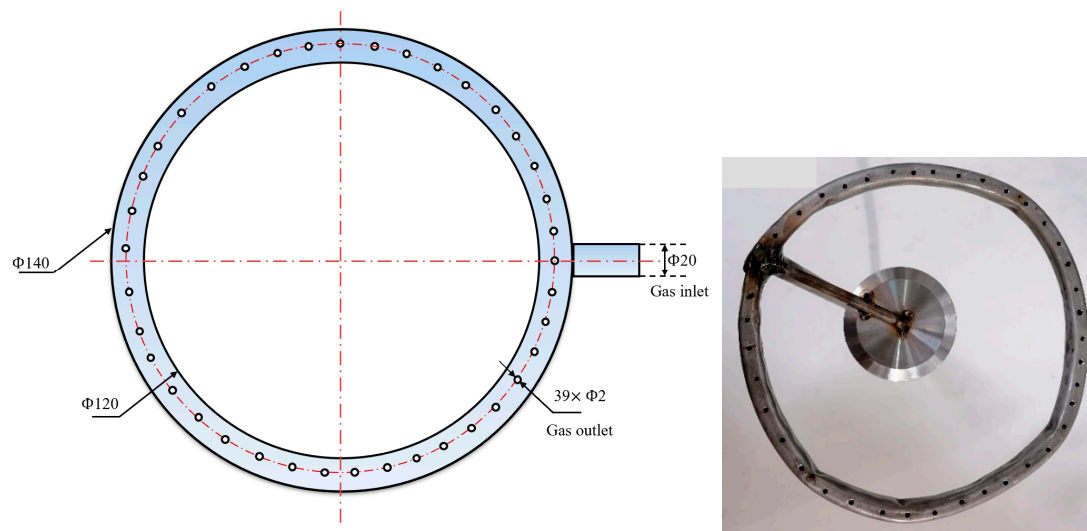

**Figure S1 Structure of the ring orifice distributor**

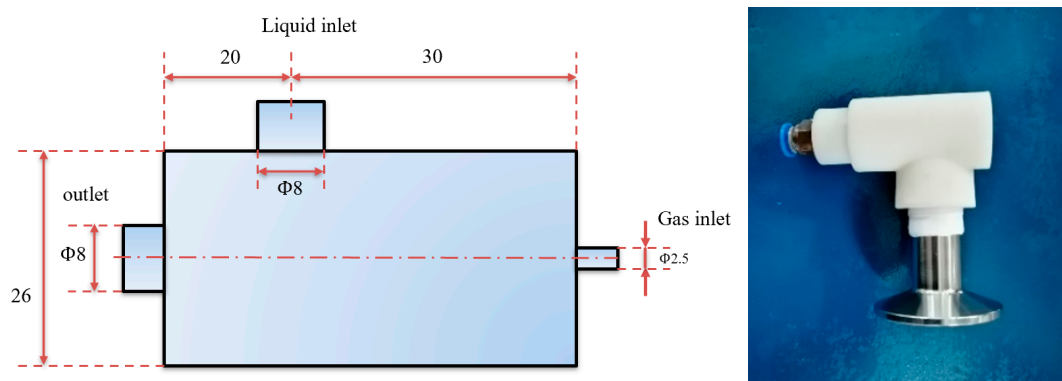

**Figure S2 Structure of the jet nozzle**

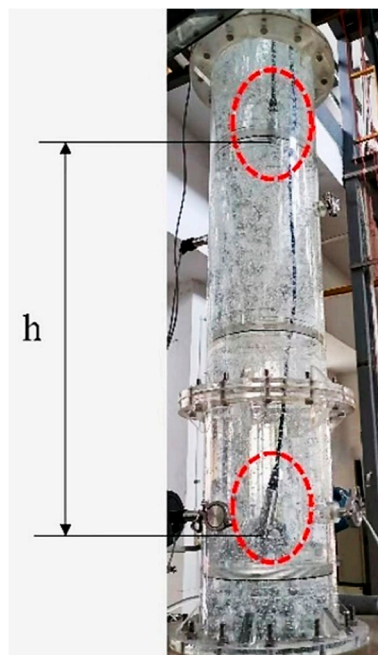

**Figure S3 Immersed pressure sensors**

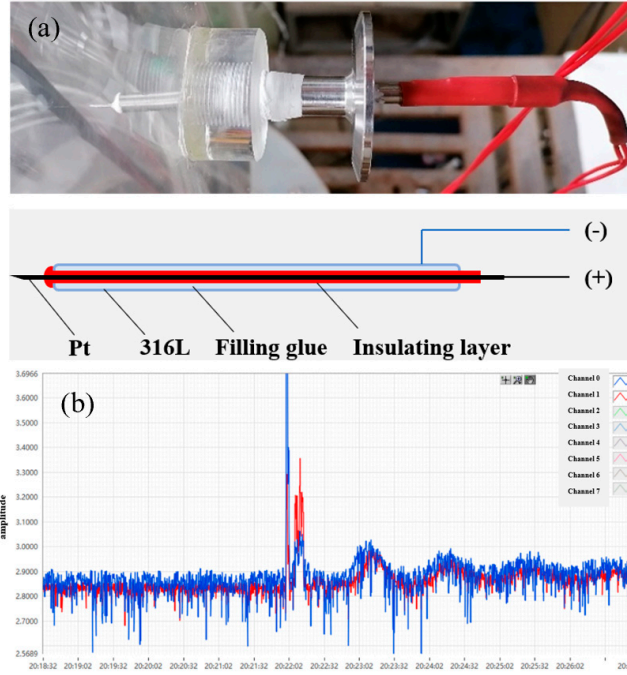

**Figure S4 (a) Schematic diagram of the structure of the conductivity probe; (b) Potential signal acquisition interface of measurement resistance**

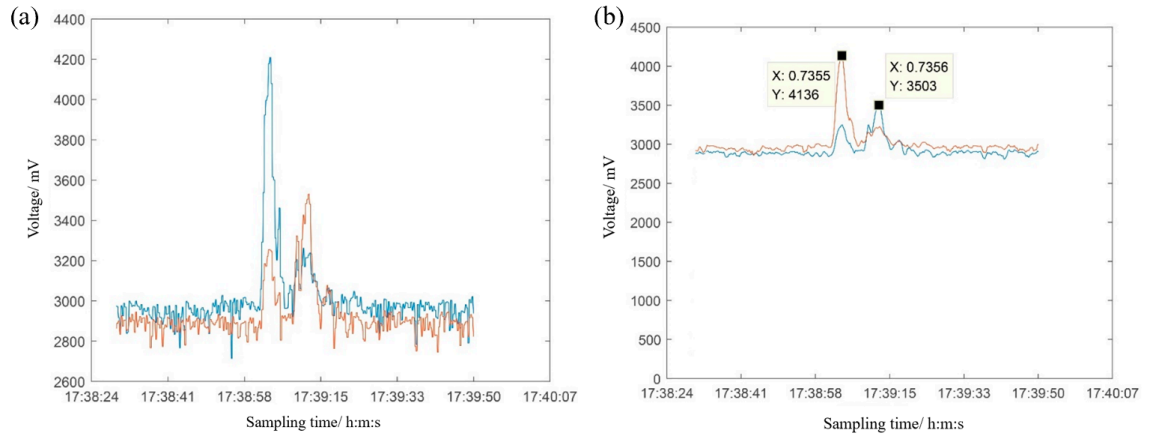

**Figure S5 (a) Originally acquired signal curves of the conductivity probes; (b) Moving-average-filtered signal curves**

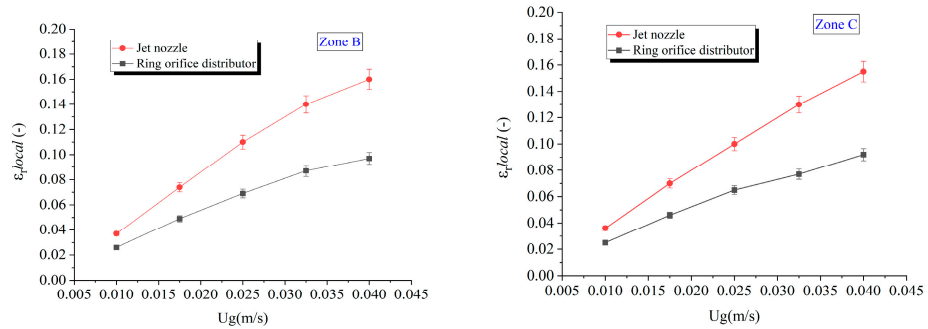

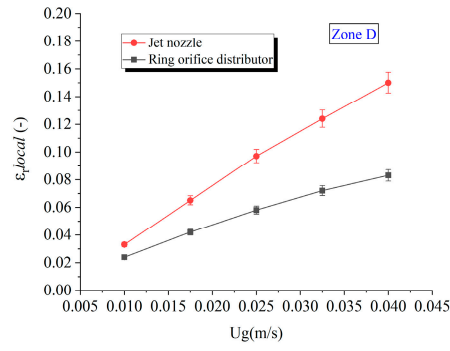

**Figure S6 Relationships between the local gas holdup  $\epsilon_{r,local}$  and superficial gas velocities  $U_g$  in areas B~D of the riser**

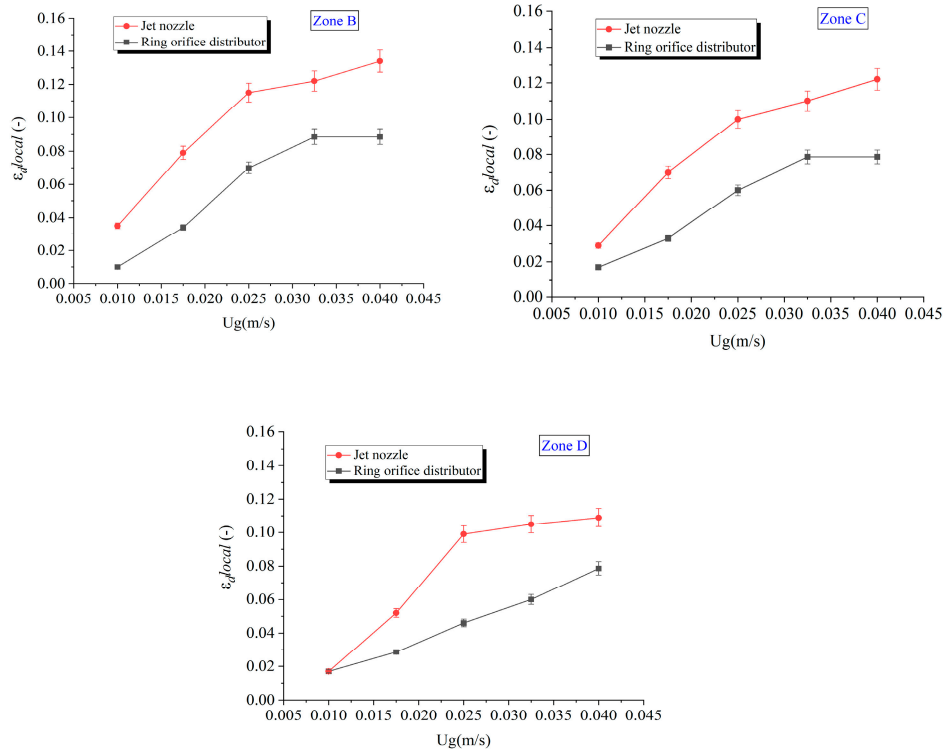

**Figure S7 Relationships between the local gas holdup  $\epsilon_{d,local}$  and superficial gas velocities  $U_g$  in areas B~D of the downcomer**
